# Supplementary material for: Application of SWATH Mass Spectrometry and Machine Learning in the Diagnosis of Inflammatory Bowel Disease Based on the Stool Proteome
Source: MDPI journal article supplement (doi:10.3390/biomedicines12020333), 2024-02-01
Supplement: s1 [file s1]

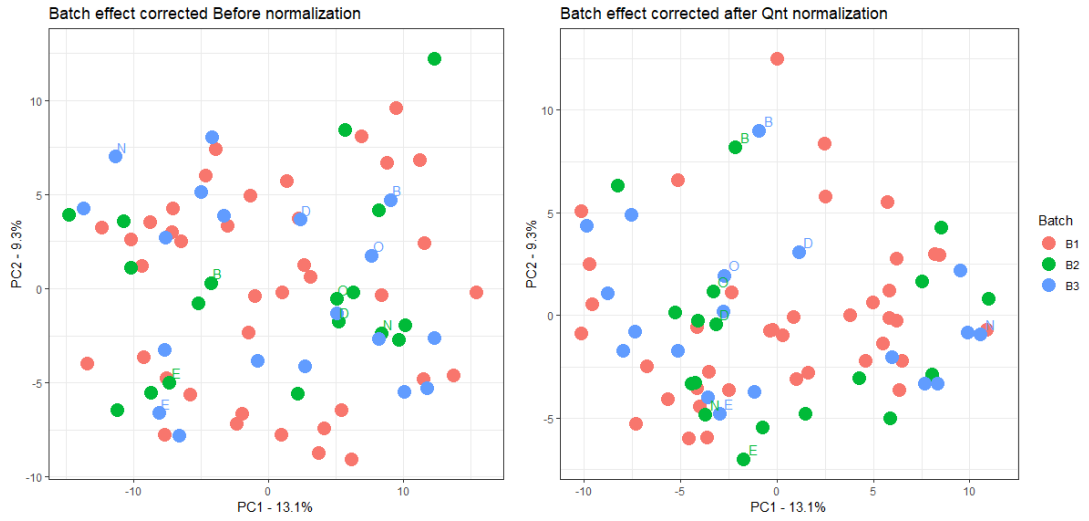

**Figure S2 :** The comparison examines the effect of normalization before and after batch effect correction. (a) PCA analysis of batch effect corrected data followed by quantile normalization. (b) PCA analysis of batch-corrected data after quantile normalization. The comparison indicates no significant differences among them.
