# Supplementary material for: Application of SWATH Mass Spectrometry and Machine Learning in the Diagnosis of Inflammatory Bowel Disease Based on the Stool Proteome
Source: MDPI journal article supplement (doi:10.3390/biomedicines12020333), 2024-02-01
Supplement: s1 [file s1]

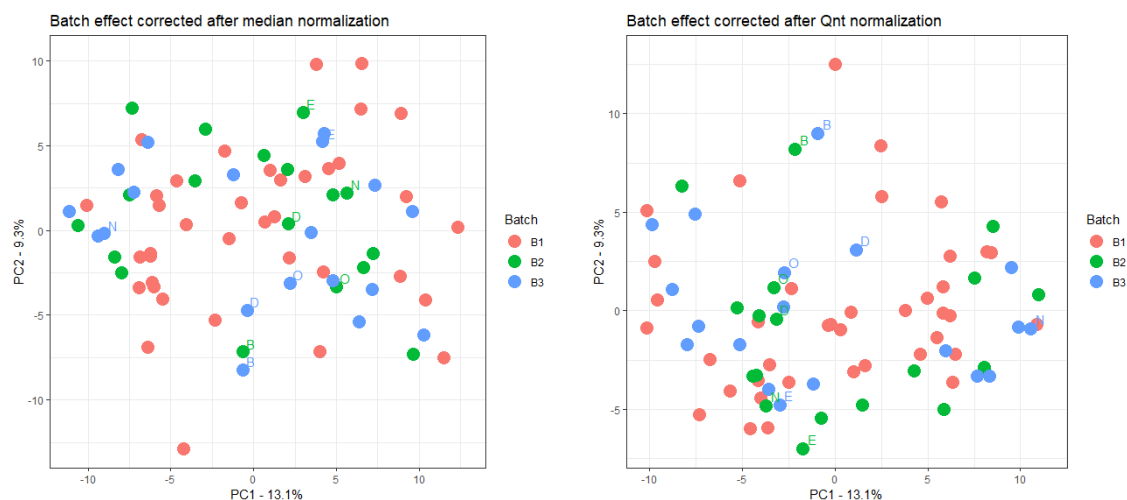

**Figure S1 :** The comparison examines the effects of two different normalization methods on batch effect correction. (a) PCA analysis of batch-corrected data after median normalization. (b) PCA analysis of batch-corrected data after quantile normalization. The comparison indicates no significant differences among them.
