# Supplementary material for: Application of SWATH Mass Spectrometry and Machine Learning in the Diagnosis of Inflammatory Bowel Disease Based on the Stool Proteome
Source: Biomedicines. 2024 Feb 1;12(2):333. doi: 10.3390/biomedicines12020333 (PMC10886680; doi:10.3390/biomedicines12020333)
Supplement: Supplementary file 1 [file biomedicines-12-00333-s001.zip › Supplementary Table S1.xlsx]

## Sheet: Sheet1
First_Protein_Description	logFC (Active_vs_Ctrl)	P_Value (Active_vs_Ctrl)	Protein.Names	Genes	Protein_Ids	Protein.Group
Protein S100-A8	2.97741	9.70292e-14	S10A8_HUMAN	S100A8	P05109	P05109
Protein S100-A9	2.79689	2.66025e-13	S10A9_HUMAN	S100A9	P06702	P06702
Myeloblastin	2.67447	1.78726e-07	PRTN3_HUMAN	PRTN3	P24158	P24158
Hemoglobin subunit delta	2.42796	1.98876e-05	HBB_HUMAN;HBD_HUMAN	HBB;HBD	P02042;P68871	P02042;P68871
Lactotransferrin	2.29903	4.233e-11	TRFL_HUMAN	LTF	P02788	P02788
Azurocidin	2.17933	1.56672e-08	CAP7_HUMAN	AZU1	P20160	P20160
Hemoglobin subunit beta	2.13324	5.31014e-05	HBB_HUMAN	HBB	P68871	P68871
Immunoglobulin heavy constant gamma 1	1.88639	5.31194e-06	IGHG1_HUMAN	IGHG1	P01857	P01857
Immunoglobulin heavy constant gamma 2	1.78337	3.07323e-05	IGHG2_HUMAN;IGHG4_HUMAN	IGHG2;IGHG4	P01859;P01861	P01859;P01861
Immunoglobulin heavy constant gamma 1	1.76951	4.02281e-06	IGHG1_HUMAN;IGHG3_HUMAN	IGHG1;IGHG3	P01857;P01860	P01857;P01860
Myeloperoxidase	1.55849	4.33014e-05	PERM_HUMAN	MPO	P05164-2;P05164-3;P05164	P05164;P05164-2;P05164-3
Alpha-1-acid glycoprotein 1	1.47213	2.78863e-06	A1AG1_HUMAN	ORM1	P02763	P02763
Immunoglobulin heavy constant gamma 2	1.45696	0.00136191	IGHG2_HUMAN;IGHG3_HUMAN;IGHG4_HUMAN	IGHG2;IGHG3;IGHG4	P01859;P01860;P01861	P01859;P01860;P01861
Neutrophil defensin 1	1.40286	0.00171061	DEF1_HUMAN;DEF3_HUMAN	DEFA1B;DEFA3	P59665;P59666	P59665;P59666
Immunoglobulin lambda constant 7	1.31178	0.00440922	IGLC3_HUMAN;IGLC6_HUMAN;IGLC7_HUMAN;IGLL5_HUMAN	IGLC3;IGLC6;IGLC7;IGLL5	A0M8Q6;B9A064;P0CF74;P0CG04;P0DOY2;P0DOY3	A0M8Q6;B9A064;P0CF74;P0DOY3
Myeloperoxidase	1.2115	0.000124516	PERE_HUMAN;PERM_HUMAN	EPX;MPO	P05164-2;P05164-3;P05164;P11678	P05164;P05164-2;P05164-3;P11678
Serum amyloid P-component	1.18327	3.60096e-05	SAMP_HUMAN	APCS	P02743	P02743
Immunoglobulin lambda-like polypeptide 5	1.16233	0.000702127	IGLL5_HUMAN	IGLL5	B9A064	B9A064
Immunoglobulin lambda constant 7	1.07194	0.0045062	IGLC3_HUMAN;IGLC6_HUMAN;IGLC7_HUMAN	IGLC3;IGLC6;IGLC7	A0M8Q6;P0CF74;P0DOY2;P0DOY3	A0M8Q6;P0CF74;P0DOY3
Immunoglobulin kappa constant	1.04017	0.00266609	IGKC_HUMAN	IGKC	P01834	P01834
Immunoglobulin lambda constant 3	1.02523	0.00440869	IGLC3_HUMAN	IGLC3	P0DOY2;P0DOY3	P0DOY3
Antithrombin-III	0.902364	0.000114733	ANT3_HUMAN	SERPINC1	P01008	P01008
Complement C3	0.835101	0.000413276	CO3_HUMAN	C3	P01024	P01024
Copine-3	0.823958	0.000517729	CPNE3_HUMAN	CPNE3	O75131	O75131
Immunoglobulin kappa variable 2D-29	0.800991	0.0356308	KV229_HUMAN;KV230_HUMAN;KVD29_HUMAN;KVD30_HUMAN	IGKV2-29;IGKV2-30;IGKV2D-29;IGKV2D-30	A0A075B6P5;A0A075B6S2;A0A075B6S6;A0A087WW87;A0A0A0MRZ7;A2NJV5;P01614;P01615;P06310	A0A075B6S2;A0A075B6S6;A2NJV5;P06310
Leukocyte elastase inhibitor	0.783837	0.00657479	ILEU_HUMAN	SERPINB1	P30740-2;P30740	P30740
Immunoglobulin heavy variable 4-4	0.77057	0.00772153	HV404_HUMAN;HV428_HUMAN;HV434_HUMAN;HVD82_HUMAN	IGHV4-28;IGHV4-34;IGHV4-38-2;IGHV4-4	A0A075B6R2;A0A087WSY4;A0A0C4DH34;A0A0C4DH41;P01824;P01825;P06331;P0DP06;P0DP07;P0DP08	A0A075B6R2;A0A0C4DH34;P06331;P0DP08
Immunoglobulin heavy variable 4-34	0.756262	0.0205799	HV434_HUMAN;HVD82_HUMAN	IGHV4-34;IGHV4-38-2	A0A0C4DH41;P01824;P01825;P06331;P0DP06;P0DP08	P06331;P0DP08
Probable non-functional immunoglobulin kappa variable 2D-24	0.751847	0.0159698	KV229_HUMAN;KVD24_HUMAN;KVD29_HUMAN	IGKV2-29;IGKV2D-24;IGKV2D-29	A0A075B6R9;A0A075B6S2;A0A0A0MRZ7;A0A0C4DH68;A2NJV5	A0A075B6R9;A0A075B6S2;A2NJV5
Phospholipase B-like 1	0.732592	5.78665e-06	PLBL1_HUMAN	PLBD1	Q6P4A8	Q6P4A8
Probable non-functional immunoglobulin kappa variable 2D-24	0.72734	0.0259388	KVD24_HUMAN	IGKV2D-24	A0A075B6R9;A0A0C4DH68	A0A075B6R9
Ferritin light chain	0.717527	0.0153474	FRIL_HUMAN	FTL	P02792	P02792
Angiotensin-converting enzyme	-0.730346	0.0157546	ACE_HUMAN	ACE	P12821-2;P12821-3;P12821-4;P12821	P12821
Galectin-3-binding protein	-0.747132	0.000788855	LG3BP_HUMAN	LGALS3BP	Q08380	Q08380
Chymotrypsin-like elastase family member 3B	-0.755797	0.00453932	CEL3B_HUMAN	CELA3B	P08861	P08861
Myosin-8	-0.763739	0.0228994	MYH2_HUMAN;MYH8_HUMAN	MYH2;MYH8	P13535;Q9UKX2	P13535;Q9UKX2
Low-density lipoprotein receptor-related protein 1B	-0.768997	0.00442652	LRP1B_HUMAN	LRP1B	Q9NZR2	Q9NZR2
Kinesin-like protein KIF20B	-0.788506	0.000137443	KI20B_HUMAN	KIF20B	Q96Q89-2;Q96Q89-3;Q96Q89-4;Q96Q89	Q96Q89;Q96Q89-2;Q96Q89-3;Q96Q89-4
Neprilysin	-0.828276	0.00043651	NEP_HUMAN	MME	P08473	P08473
Meprin A subunit beta	-0.856324	0.00673875	MEP1B_HUMAN	MEP1B	Q16820	Q16820
Meprin A subunit alpha	-0.905666	0.00375586	MEP1A_HUMAN	MEP1A	Q16819	Q16819
Chloride anion exchanger	-0.925299	0.00354121	S26A3_HUMAN	SLC26A3	P40879	P40879
CUB and zona pellucida-like domain-containing protein 1	-0.97075	0.027224	CUZD1_HUMAN	CUZD1	Q86UP6-2;Q86UP6-3;Q86UP6	Q86UP6;Q86UP6-3
Chymotrypsinogen B2	-0.99012	0.0275027	CTRB2_HUMAN	CTRB2	Q6GPI1	Q6GPI1
Synaptotagmin-like protein 4	-0.996601	2.8325e-05	SYTL4_HUMAN	SYTL4	Q96C24-2;Q96C24	Q96C24;Q96C24-2
Kallikrein-1	-1.10696	0.00453744	KLK1_HUMAN	KLK1	P06870-2;P06870	P06870
F-box only protein 3	-1.23623	0.000893479	FBX3_HUMAN	FBXO3	Q9UK99-2;Q9UK99-3;Q9UK99	Q9UK99;Q9UK99-2;Q9UK99-3
Neutral ceramidase	-1.37193	1.39758e-06	ASAH2_HUMAN	ASAH2	Q9NR71-2;Q9NR71	Q9NR71;Q9NR71-2
